# Supplementary material for: The Level of Selected Bacterial Phyla on the Skin Surface of Small Ruminants According to the Breed and Species
Source: MDPI journal article supplement (doi:10.3390/ani11092734), 2021-09-18
Supplement: s1 [file s1]

### Data of relative ratio (%) of selected bacteria phyla:

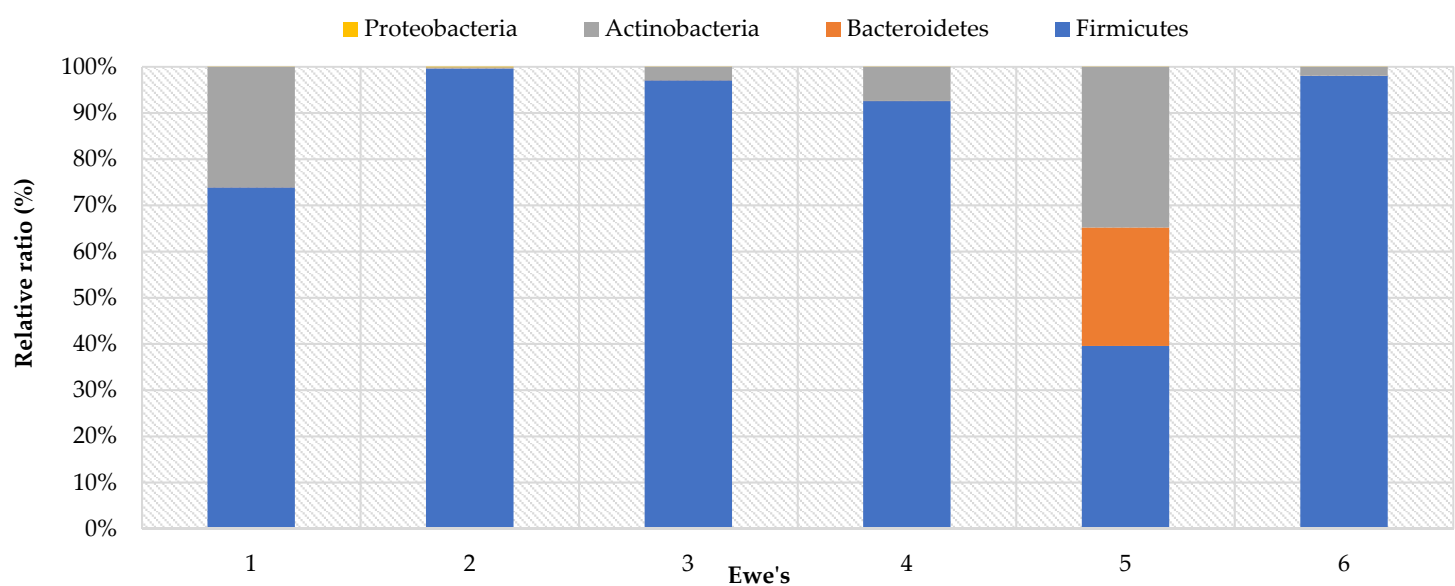

**Figure S1.** Relative ratio (%) of selected phyla on Świniarka sheep skin surface.

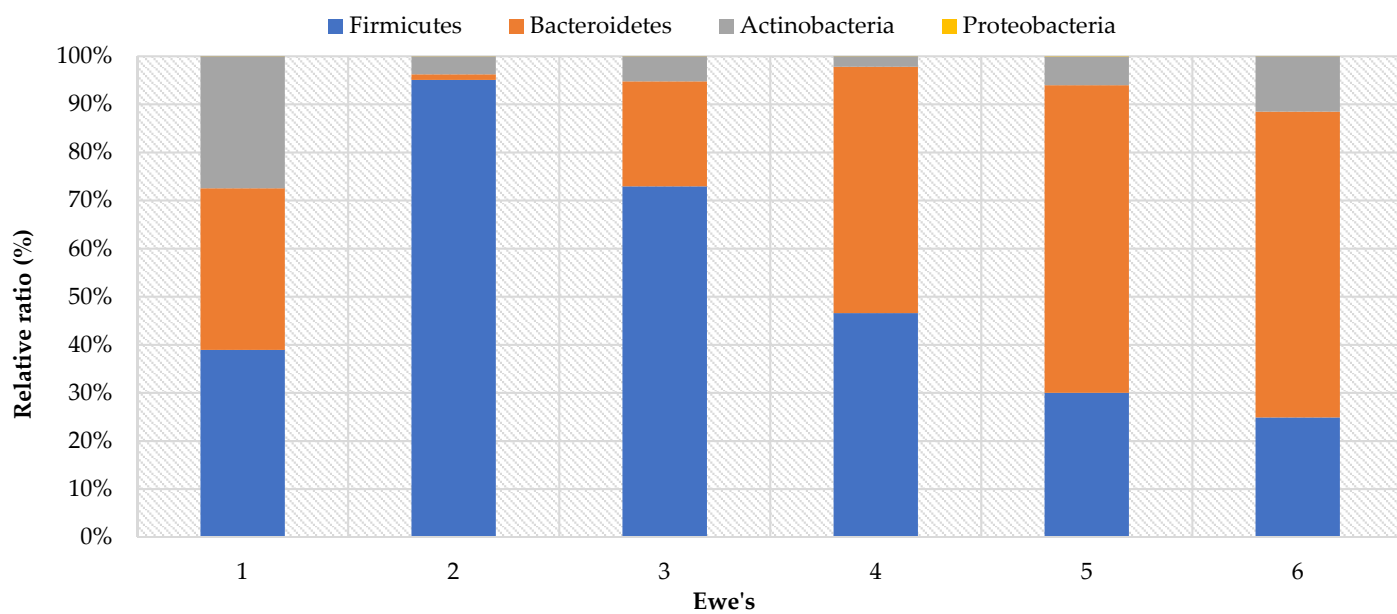

**Figure S2.** Relative ratio (%) of selected phyla on BCP sheep skin surface.

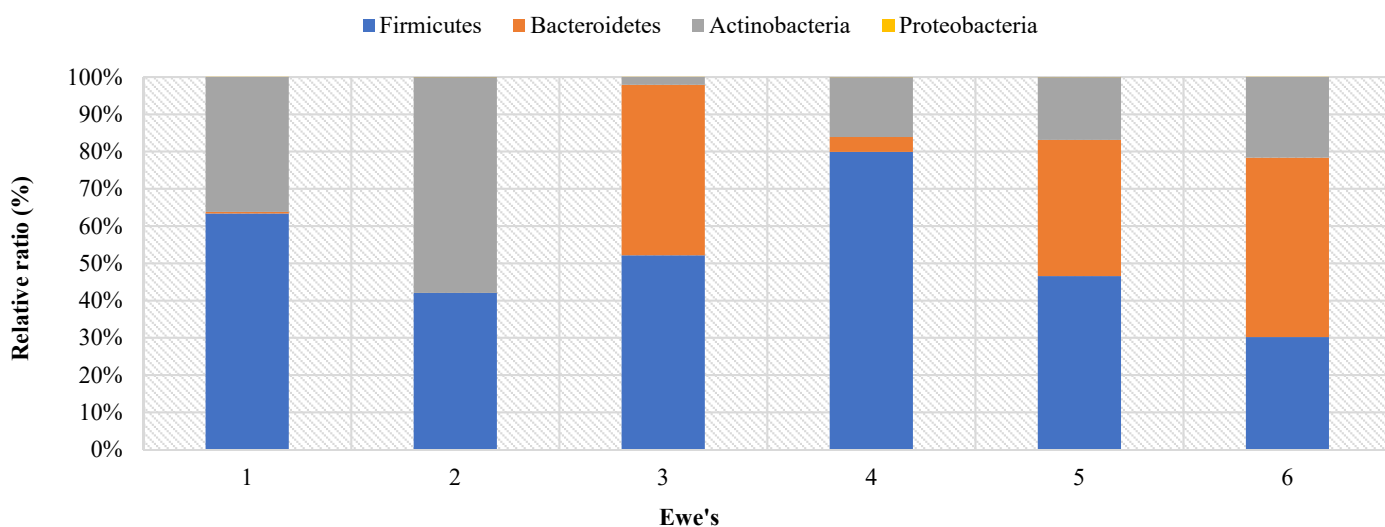

**Figure S3.** Relative ratio (%) of selected phyla on Urhuska sheep skin surface.

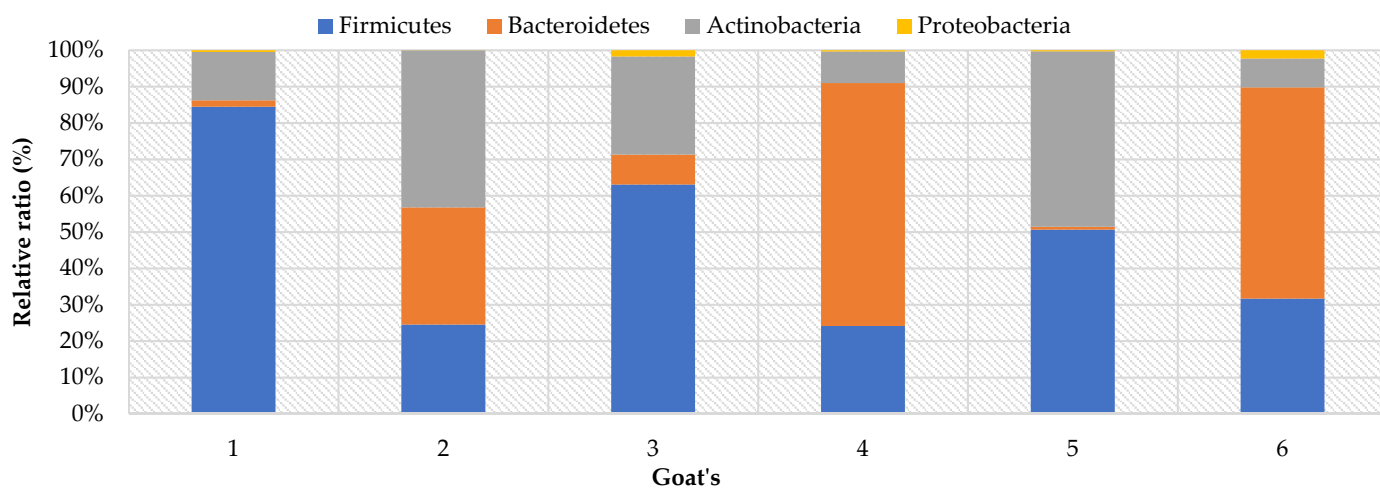

**Figure S4.** Relative ratio (%) of selected phyla on Saanian Goat skin surface.

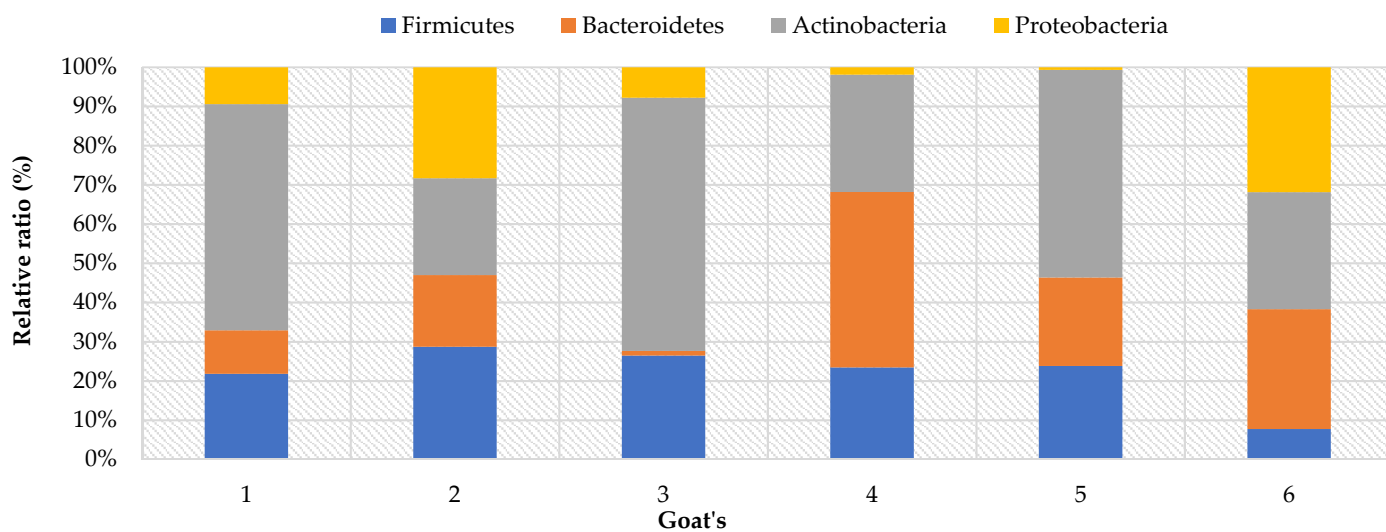

**Figure S5.** Relative ratio (%) of selected phyla on Boer Goat skin surface.
